# Supplementary material
Source: HighWire-hosted journal article supplement (https://gut.bmj.com/content/gutjnl-2020-321190)

**A** Correlation (average neutralization) Figure S3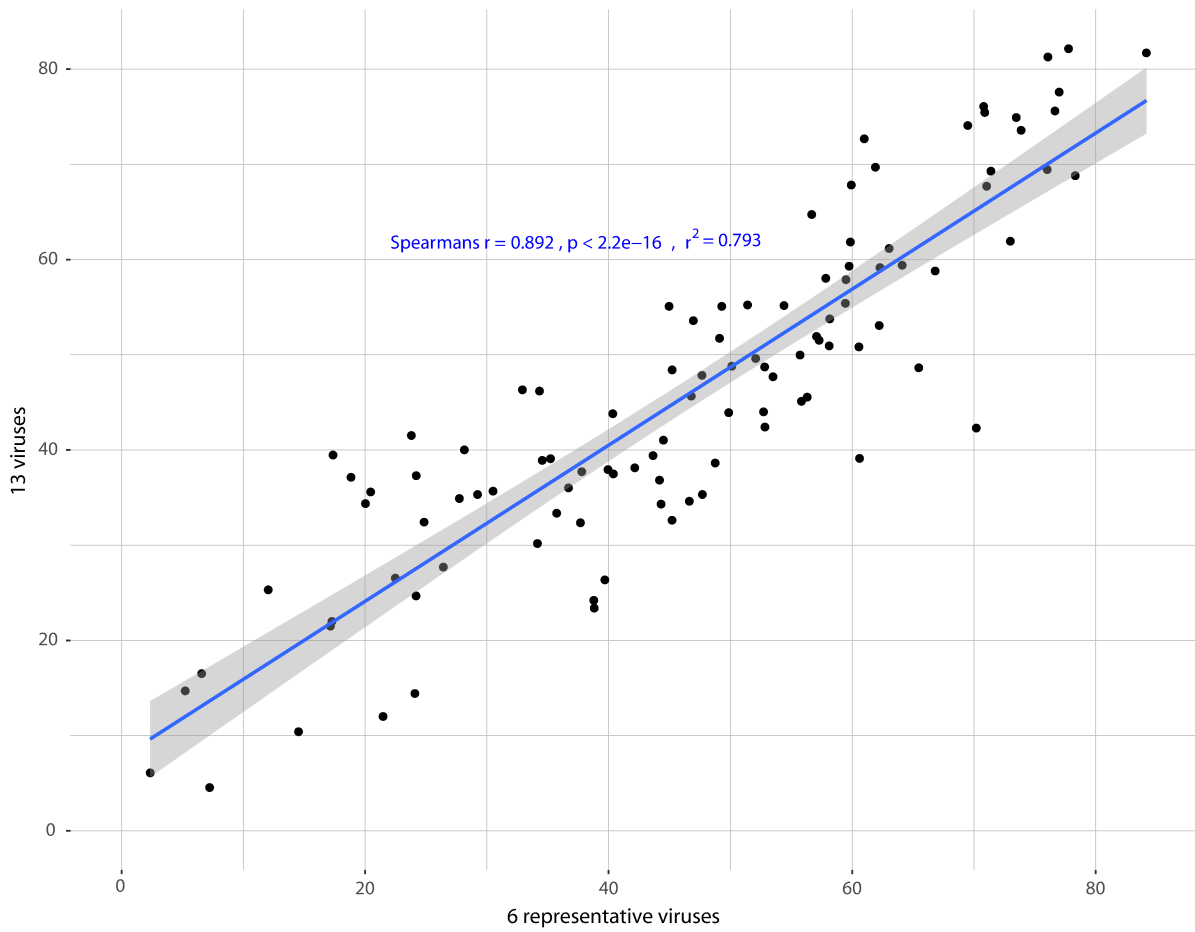**B** Correlation (CNI)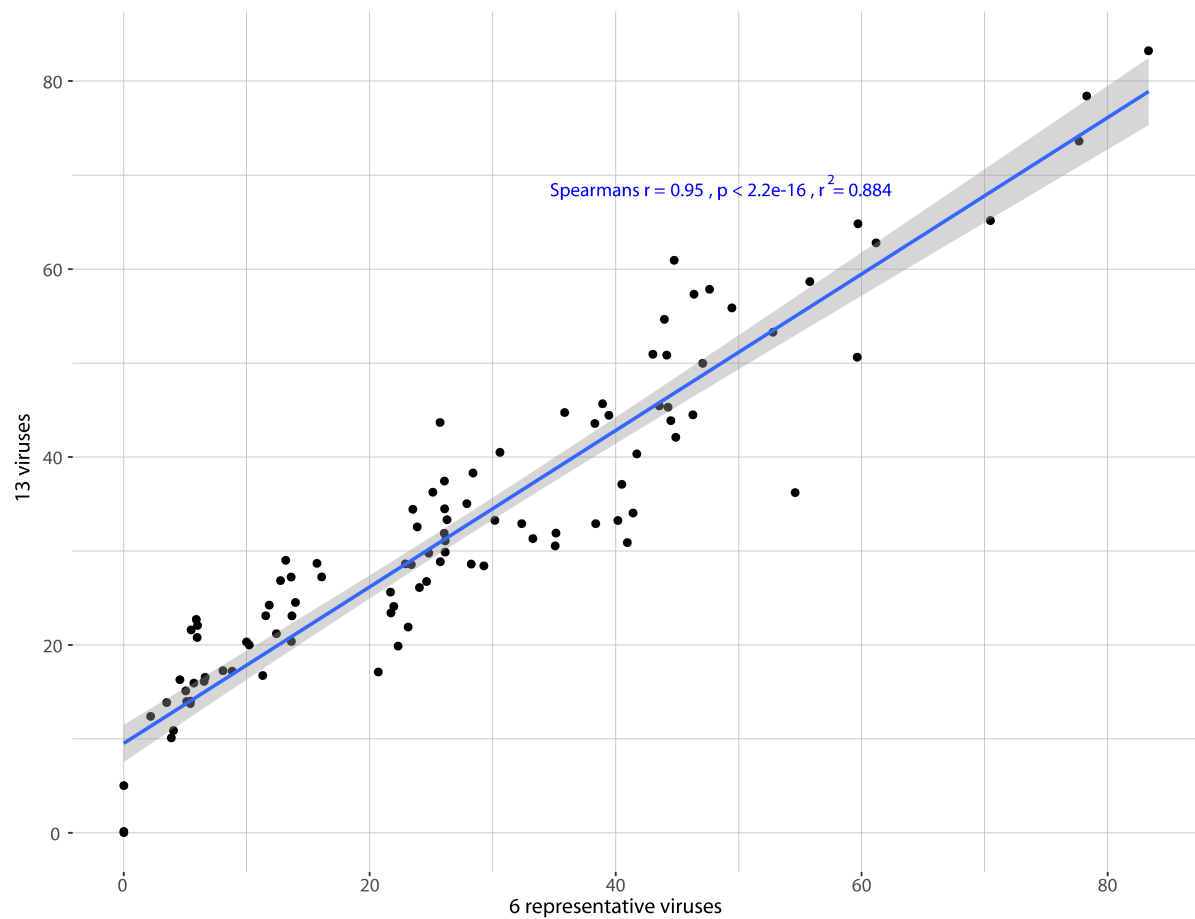

Supplement: inline-supplementary-material-4 [file inline-supplementary-material-4.pdf]

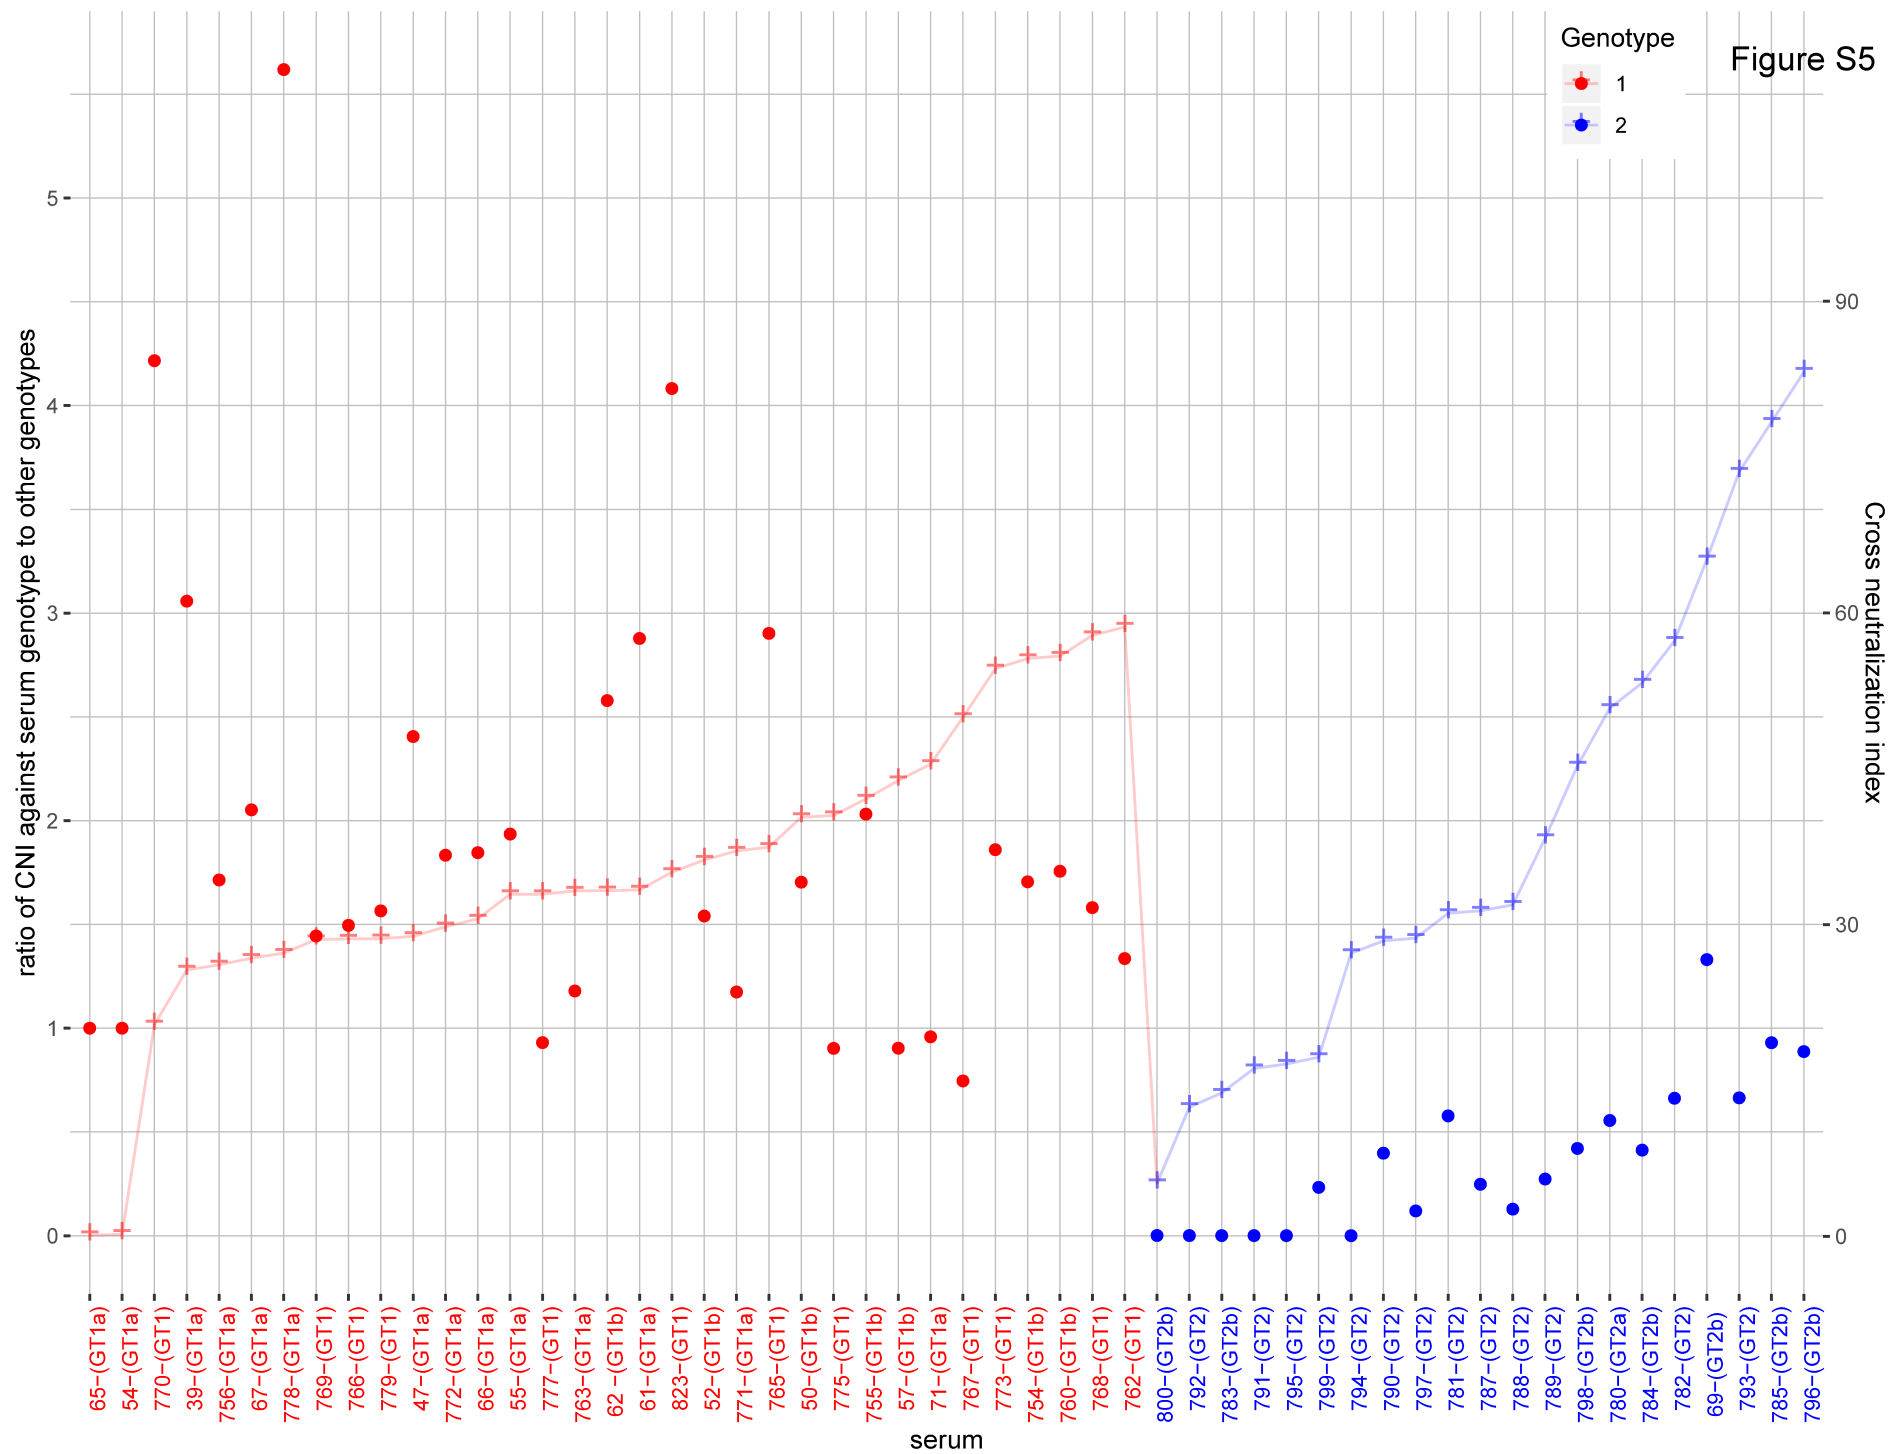

Supplement: inline-supplementary-material-6 [file inline-supplementary-material-6.pdf]

Figure S6

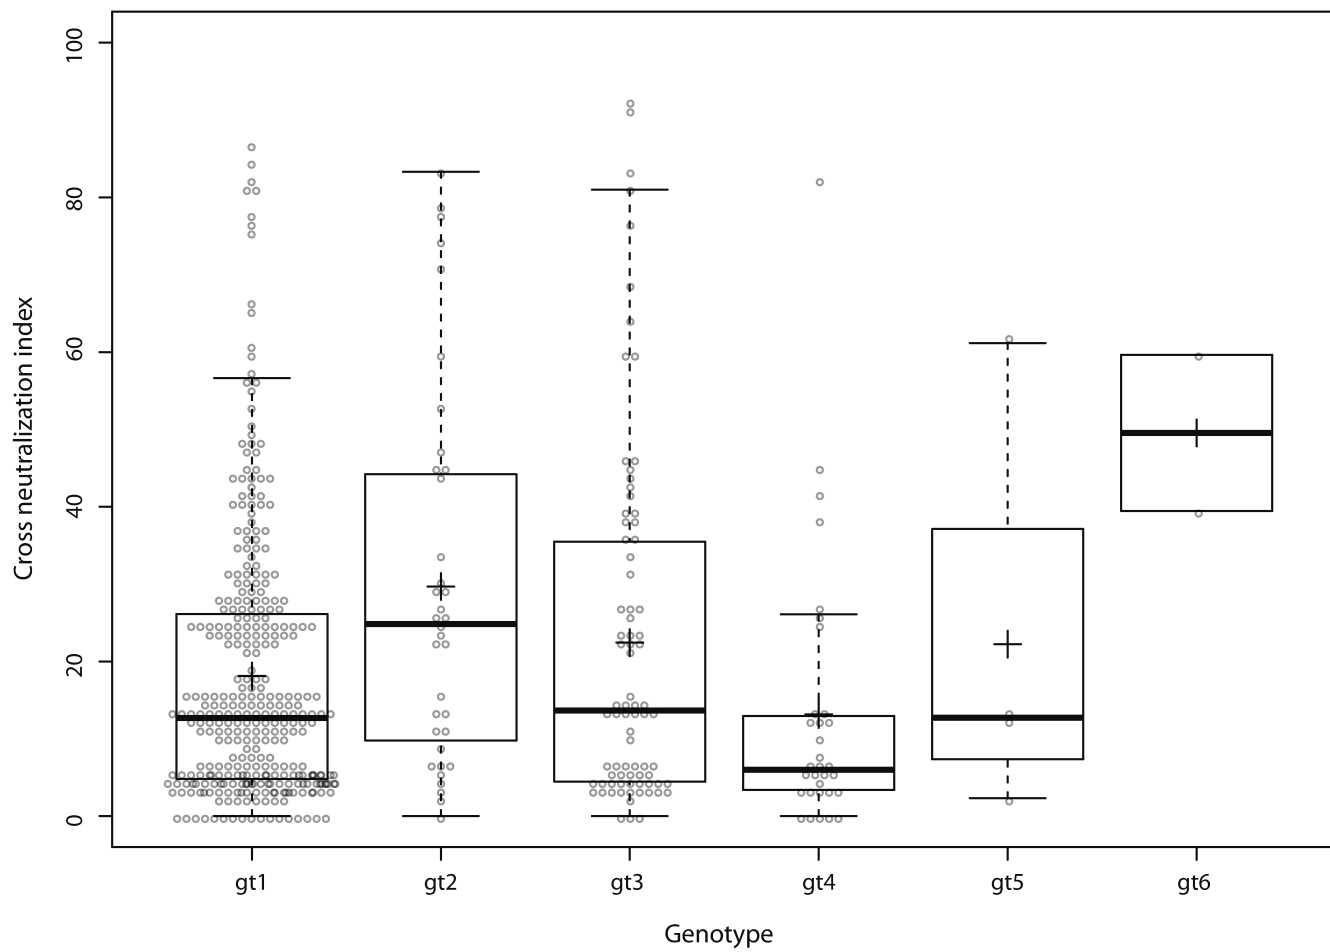

Supplement: inline-supplementary-material-7 [file inline-supplementary-material-7.pdf]
